# Supplementary material for: A facile approach to fabricateSaccharum spontaneum-derived porous carbon-based supercapacitors for excellent energy storage performance in redox active electrolytes
Source: Royal Society of Chemistry journal article supplement (doi:10.1039/d0se01420f), 2020-11-23
Supplement: d0se01420f2.pdf [file d0se01420f2.pdf]

## Supporting Information

### **A facile approach on Saccharum spontaneum derived porous carbon-based supercapacitor for excellent energy storage performance in redox active electrolyte**

**R. Samantray<sup>a\*</sup>, M. Karnan<sup>b,d</sup>, Vivekanand<sup>b</sup>, K. Subramani<sup>b</sup>, C. Jesica Anjeline<sup>c</sup>,  
S.C. Mishra<sup>a</sup> and M. Sathish<sup>b,d\*</sup>**

<sup>a</sup>Department of Metallurgical and Materials Engineering, National Institute of Technology Rourkela, Rourkela - 769 008, Odisha, India.

<sup>b</sup>Electrochemical Power Sources Division, CSIR - Central Electrochemical Research Institute, Karaikudi – 630 003, Tamil Nadu, India.

<sup>c</sup>Electro organic and Materials Electrochemistry Division, CSIR - Central Electrochemical Research Institute, Karaikudi – 630 003, Tamil Nadu, India.

<sup>d</sup>Academy of Scientific and Innovative Research (AcSIR),  
Ghaziabad-201 002, India.

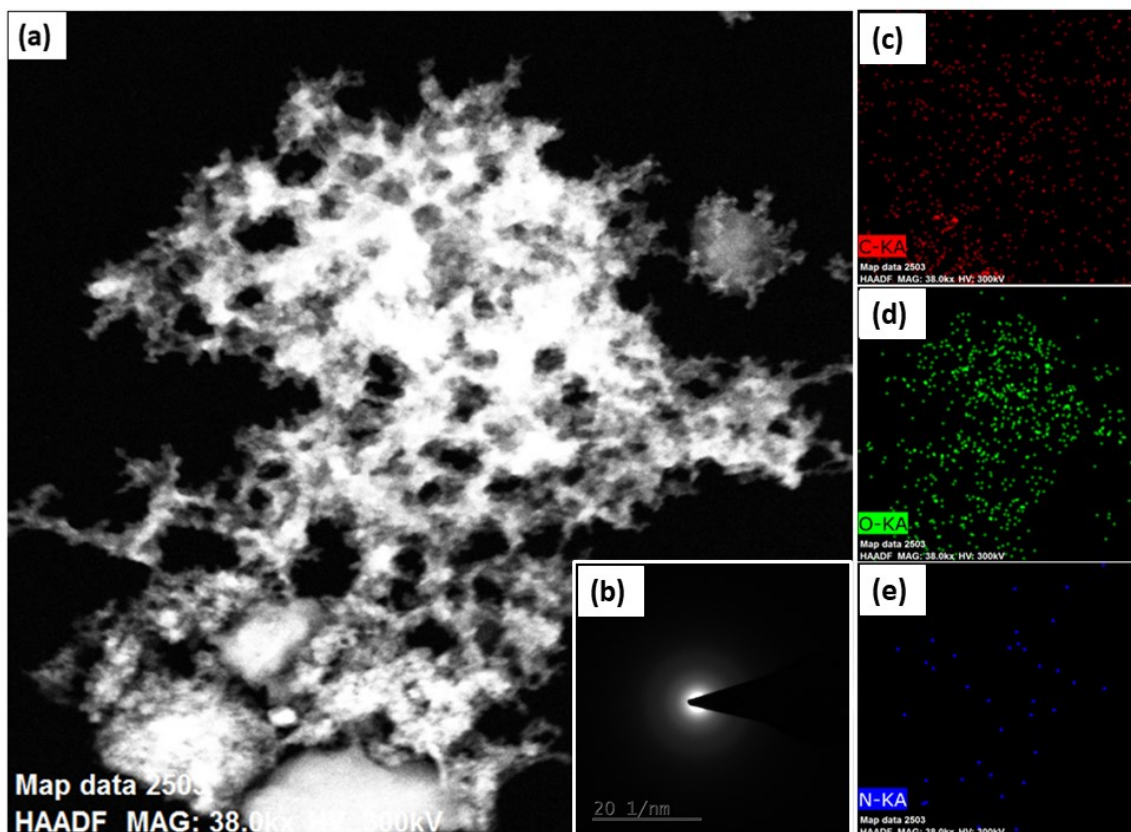

**Figure S1.** (a) Selected area of TEM image (b) SAED pattern of SZE2-600 and its elemental mapping for (c) C, (d) O and (e) N atoms.

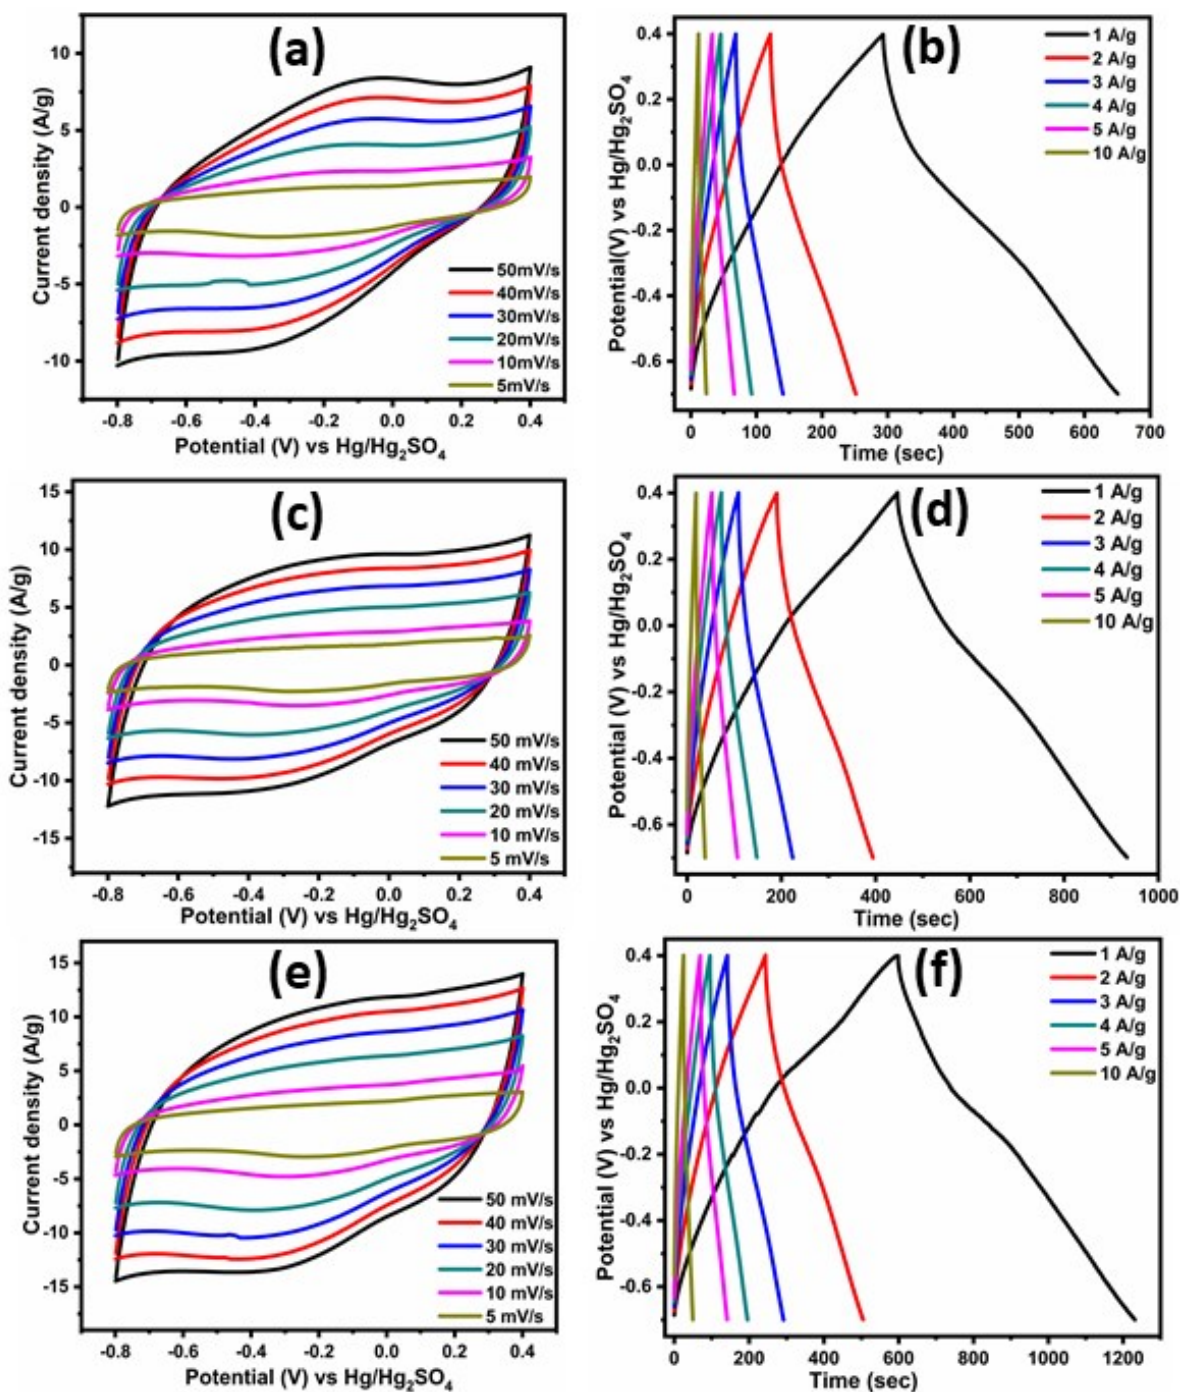

**Figure S2.** CV and CD profile of (a-b) SZE2-500 , (c-d) SZE2-700 and (c-d) SZE2-800 sample at different scan rates and current densities, respectively.

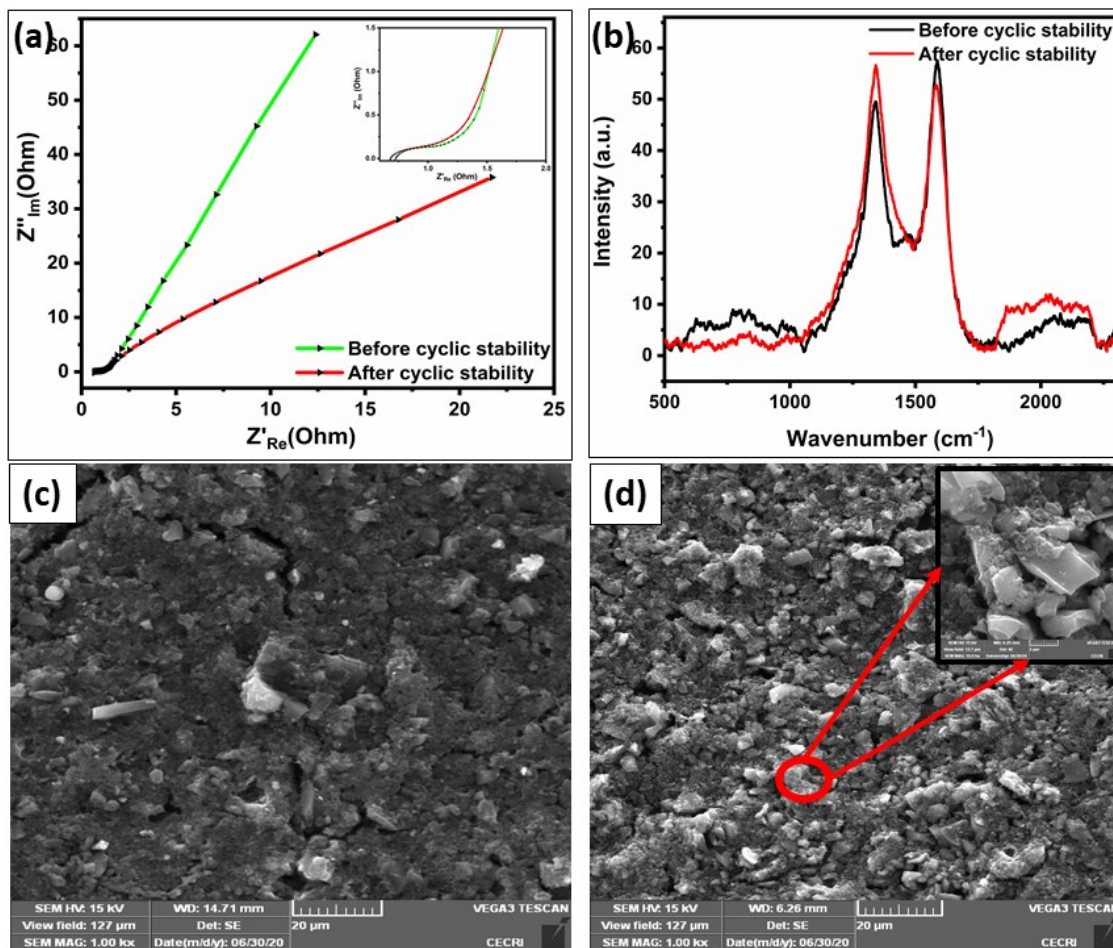

**Figure S3.** (a) Nyquist plot and (b) Raman spectrum of SZE2-600 electrode before and after 1000 cycles; SEM image of SZE2-600 electrode (c) before and (d) after cyclic stability test.

**Table**

**S1.**

The

| <b>Sample</b>   | <b>BET specific surface area (m<sup>2</sup>/g)</b> | <b>Pore volume (cm<sup>3</sup>/g)</b> | <b>Pore diameter (nm)</b> |
|-----------------|----------------------------------------------------|---------------------------------------|---------------------------|
| <b>SZE2-500</b> | 828                                                | 0.743                                 | 3.7944                    |
| <b>SZE2-600</b> | 1590                                               | 0.895                                 | 1.656                     |
| <b>SZE2-700</b> | 1046                                               | 0.585                                 | 1.656                     |
| <b>SZE2-800</b> | 1128                                               | 0.618                                 | 1.688                     |

measured specific surface areas, pore volume and pore diameter of the samples.

**Table S2.** The specific capacitance value for all the samples.

| <b>Materials</b> | <b>Specific capacitance (F/g)</b> |            |            |            |            |            |
|------------------|-----------------------------------|------------|------------|------------|------------|------------|
|                  | 1 A/g                             | 2 A/g      | 3 A/g      | 4 A/g      | 5 A/g      | 10 A/g     |
| <b>SZE2-500</b>  | <b>414</b>                        | <b>336</b> | <b>289</b> | <b>248</b> | <b>211</b> | <b>155</b> |
| <b>SZE2-600</b>  | <b>561</b>                        | <b>524</b> | <b>469</b> | <b>425</b> | <b>382</b> | <b>280</b> |
| <b>SZE2-700</b>  | <b>444</b>                        | <b>371</b> | <b>311</b> | <b>273</b> | <b>245</b> | <b>173</b> |
| <b>SZE2-800</b>  | <b>547</b>                        | <b>476</b> | <b>409</b> | <b>364</b> | <b>322</b> | <b>218</b> |



**Table S3.** Comparison table for suitability of present work for supercapacitor application in two-electrode configuration.

| Carbon source                  | SSA (m <sup>2</sup> /g) | Electrolyte                           | Current density      | Sp. Cap. (F/g) | Energy density (Wh/kg) | Power density (W/kg) | Ref.             |
|--------------------------------|-------------------------|---------------------------------------|----------------------|----------------|------------------------|----------------------|------------------|
| <b>Willow wood</b>             | 2800                    | 6 M KOH                               | 1 A/g                | 197            | 23                     | 10000                | 1                |
| <b>Sisal fibre</b>             | 2289                    | 6 M KOH                               | 0.5 A/g              | 146            | 11.9                   | 5000                 | 2                |
| <b>Rice husk</b>               | 3619                    | 6 M KOH                               | 0.2 A/g              | 205            | 7.1                    | 103.2                | 3                |
| <b>Carbon aerogels</b>         | 1681.6                  | 0.5 M H <sub>2</sub> SO <sub>4</sub>  | 0.5 A/g              | 198            | 26.2                   | 1000                 | 4                |
| <b>Lignin rich residue</b>     | 2182                    | 1 TEABF <sub>4</sub> in ACN           | 1 mA/cm <sup>2</sup> | 132            | 33.4                   | 7400                 | 5                |
| <b>Hybrid willow</b>           | 2536                    | 6M KOH                                | 0.1 A/g              | 162.3          | 17.5                   | 209                  | 6                |
| <b>Chestnut shell</b>          | 1987                    | 6M KOH                                | 0.1 A/g              | 105.4          | -                      | -                    | 7                |
| <b>White sugar</b>             | 717.1                   | 1M Na <sub>2</sub> SO <sub>4</sub>    | 1 A/g                | 242.67         | 19                     | 750                  | 8                |
| <b>Laminaria japonica</b>      | 2000                    | 6M KOH                                | 1 A/g                | 248            | 8.6                    | 500                  | 9                |
| <b>Chestnut shell</b>          | 1347.9                  | 1M H <sub>2</sub> SO <sub>4</sub>     | 0.5 A/g              | 201            | -                      | -                    | 10               |
| <b>Carbon aerogels</b>         | 1101                    | 0.5 M H <sub>2</sub> SO <sub>4</sub>  | 0.2 A/g              | 124.4          | 4.32                   | 100                  | 11               |
| <b>Sulphur doped waste tea</b> | 771                     | 6M KOH                                | 1 A/g                | 144.7          | 20.1                   | -                    | 12               |
| <b>Paulownia flower</b>        | 1159                    | 6M KOH                                | 1 A/g                | 297            | 22.2                   | 247                  | 13               |
| <b>N, B doped bamboo</b>       | 171.5                   | 1M H <sub>2</sub> SO <sub>4</sub>     | 0.2 A/g              | 318            | 42.1                   | 95                   | 14               |
| <b>Shiitake mushroom</b>       | 2988                    | 6M KOH                                | 0.2 A/g              | 238            | 8.2                    | 100                  | 15               |
| <b>Saccharum Spontaneum</b>    | <b>1719</b>             | <b>1M H<sub>2</sub>SO<sub>4</sub></b> | <b>1 A/g</b>         | <b>275</b>     | <b>13.2</b>            | <b>5607</b>          | <b>This work</b> |

SSA - Specific Surface Area;

Sp. Cap. – Specific Capacitance;

Ref. - Reference

## References

- 1 J. Phiri, J. Dou, T. Vuorinen, P. A. C. Gane and T. C. Maloney, *ACS Omega*, 2019, **4**, 18108–18117.
- 2 M. Li, H. Xiao, T. Zhang, Q. Li and Y. Zhao, *ACS Sustain. Chem. Eng.*, 2019, **7**, 4716–4723.
- 3 H. Zhang, X. He, F. Wei, S. Dong, N. Xiao and J. Qiu, *ACS Sustain. Chem. Eng.*, 2020, acssuschemeng.9b05075.
- 4 Y. Zhang, C. Zhao, W. K. Ong and X. Lu, *ACS Sustain. Chem. Eng.*, 2019, **7**, 403–411.
- 5 J. Han, S. Y. Jeong, J. H. Lee, J. W. Choi, J. W. Lee and K. C. Roh, *ACS Sustain. Chem. Eng.*, 2019, **7**, 2471–2482.
- 6 G. A. Yakaboylu, T. Yumak, C. Jiang, J. W. Zondlo, J. Wang and E. M. Sabolsky, *Energy and Fuels*, 2019, **33**, 9309–9329.
- 7 L. Cheng, P. Guo, R. Wang, L. Ming, F. Leng, H. Li and X. S. Zhao, *Colloids Surfaces A Physicochem. Eng. Asp.*, 2014, **446**, 127–133.
- 8 K. O. Oyedotun, F. Barzegar, A. A. Mirghni, A. A. Khaleed, T. M. Masikhwa and N. Manyala, *ACS Sustain. Chem. Eng.*, 2019, **7**, 537–546.
- 9 J. Wang, F. Qin, Z. Guo and W. Shen, *ACS Sustain. Chem. Eng.*, 2019, **7**, 11550–11563.
- 10 G. Dai, L. Zhang, Y. Liao, Y. Shi, J. Xie, F. Lei and L. Fan, , DOI:10.1021/acs.jpcc.9b10587.
- 11 S. Geng, J. Wei, S. Jonasson, J. Hedlund and K. Oksman, , DOI:10.1021/acsami.9b19955.
- 12 S. Yaglikci, Y. Gokce, E. Yagmur and Z. Aktas, *Environ. Technol.*, 2019, **3330**, 1–13.
- 13 J. Chang, Z. Gao, X. Wang, D. Wu, F. Xu, X. Wang, Y. Guo and K. Jiang, *Electrochim. Acta*, 2015, **157**, 290–298.
- 14 H. Chen, D. Liu, Z. Shen, B. Bao, S. Zhao and L. Wu, *Electrochim. Acta*, 2015, **180**, 241–251.
- 15 P. Cheng, S. Gao, P. Zang, X. Yang, Y. Bai, H. Xu, Z. Liu and Z. Lei, *Carbon N. Y.*, 2015, **93**, 315–324.
